# Supplementary material
Source: PubMed Central journal article supplement (PMC10430023)
Supplement: NIHMS1701177-supplement-1.pdf [file NIHMS1701177-supplement-1.pdf]

**Supplemental Table 1.** Comparison of the Proportion of Subjects Experiencing Solicited Events by Treatment Group

| Symptom              | Subjects who received NDV-3A (N=189) | Subjects who received placebo (N=191) | Difference in Proportion (95% CI) | p-value |
|----------------------|--------------------------------------|---------------------------------------|-----------------------------------|---------|
| Any symptom          | 0.33 (0.27-0.41)                     | 0.28 (0.22-0.35)                      | 0.05 (-0.04 – 0.15)               | 0.266   |
| Any systemic symptom | 0.19 (0.14-0.25)                     | 0.16 (0.11-0.22)                      | 0.03 (-0.04 – 0.11)               | 0.418   |
| Fever                | 0.01 (0.00-0.04)                     | 0.01 (0.00-0.03)                      | 0.00 (-0.01 – 0.02)               | 1.00    |
| Feverishness         | 0.05 (0.02-0.09)                     | 0.02 (0.00-0.05)                      | 0.03 (-0.00 – 0.07)               | 0.086   |
| Headache             | 0.05 (0.03-0.10)                     | 0.07 (0.04-0.11)                      | -0.02 (-0.06 – 0.03)              | 0.668   |
| Fatigue              | 0.04 (0.02-0.08)                     | 0.05 (0.02-0.09)                      | -0.01 (-0.05 – 0.04)              | 1.00    |
| Arthralgia           | 0.05 (0.03-0.10)                     | 0.01 (0.00-0.04)                      | 0.04 (0.01 – 0.08)                | 0.020   |
| Myalgia              | 0.04 (0.02-0.08)                     | 0.02 (0.01-0.05)                      | 0.02 (-0.01 – 0.06)               | 0.257   |
| Nausea               | 0.01 (0.00-0.04)                     | 0.02 (0.00-0.05)                      | -0.01 (-0.03 – 0.02)              | 1.00    |
| Vomiting             | 0.00 (0.00-0.00)                     | 0.00 (0.00-0.02)                      | 0.00                              | NA      |
| Diarrhea             | 0.01 (0.00-0.04)                     | 0.01 (0.00-0.03)                      | 0.00 (-0.01 – 0.02)               | 0.622   |
| Chills               | 0.02 (0.01-0.05)                     | 0.03 (0.01-0.07)                      | -0.01 (-0.04 – 0.02)              | 0.751   |
| Sweats               | 0.01 (0.00-0.03)                     | 0.01 (0.00-0.04)                      | 0.00 (-0.02 – 0.01)               | 1.00    |
| Any local symptom    | 0.20 (0.15-0.27)                     | 0.16 (0.11-0.22)                      | 0.04 (-0.04 – 0.12)               | 0.353   |
| Pain                 | 0.20 (0.14-0.26)                     | 0.16 (0.11-0.22)                      | 0.04 (-0.04 – 0.11)               | 0.424   |
| Erythema             | 0.01 (0.00-0.04)                     | 0.00 (0.00-0.02)                      | 0.01 (-0.00 – 0.03)               | 0.247   |
| Swelling             | 0.01 (0.00-0.04)                     | 0.00 (0.00-0.02)                      | 0.01 (-0.00 – 0.03)               | 0.247   |

Note: The solicited systemic symptom of fever was defined as a documented oral temperature of 100.4–101.1° F (mild), 101.2–

102.0° F (moderate), and >102.1–104.0° F (severe). Feverishness was a subjective measure, as reported by the study participant.

**Supplemental Figure 1.** Maximum Severity of Solicited Systemic Symptoms Per Subject by Treatment Group

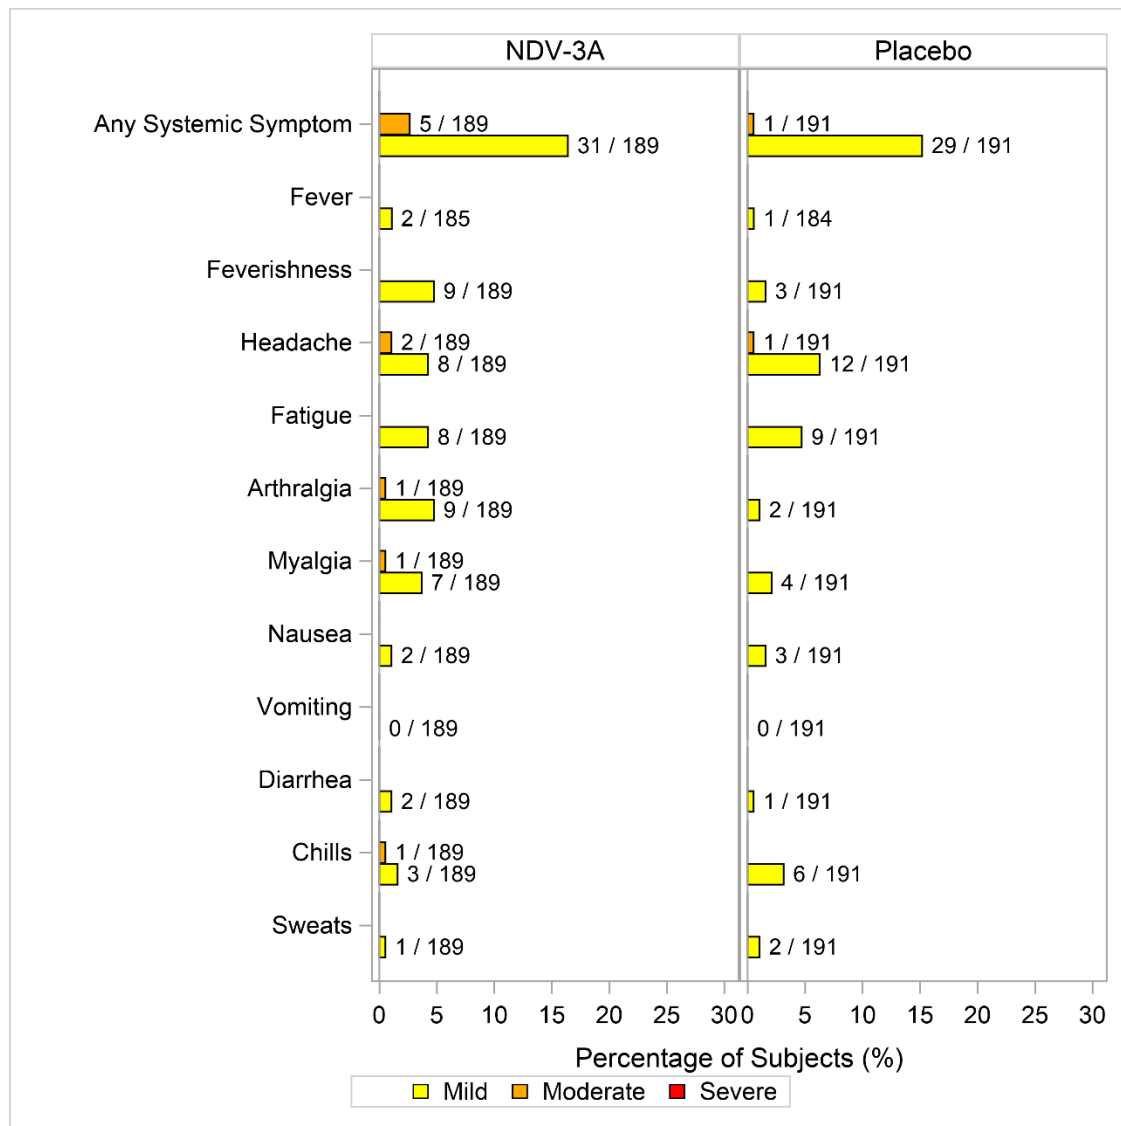

**Supplemental Figure 2.** Maximum Severity of Solicited Local Symptoms Per Subject by Treatment Group

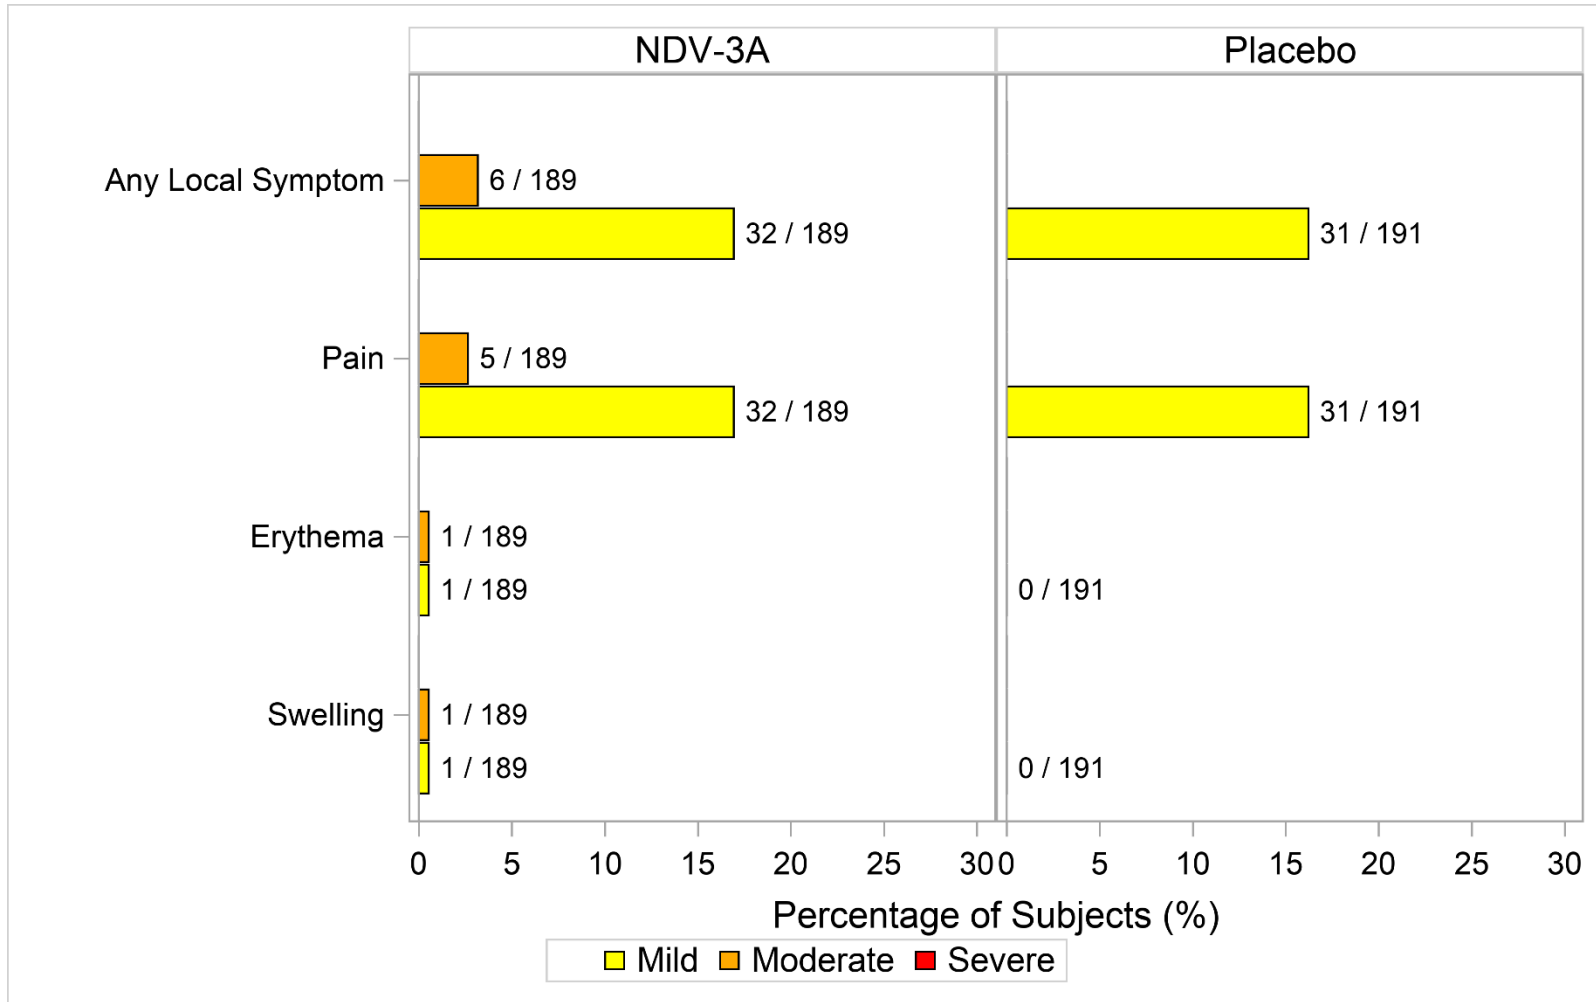

**Supplemental Table 2a.** Geometric Mean Titer (GMT) of *S. aureus* Als3-IgG in Saliva by Time Point, Treatment Group, and Baseline Nasal Colonization Status

| Time Point               | Statistic | <u>Baseline <i>S. aureus</i> Nasal<br/>Colonization Negative Subjects</u> |                   | <u>Baseline <i>S. aureus</i> Nasal<br/>Colonization Positive Subjects</u> |                  | <u>All Subjects</u> |                   |
|--------------------------|-----------|---------------------------------------------------------------------------|-------------------|---------------------------------------------------------------------------|------------------|---------------------|-------------------|
|                          |           | NDV-3A<br>(N=20)                                                          | Placebo<br>(N=10) | NDV-3A<br>(N=7)                                                           | Placebo<br>(N=4) | NDV-3A<br>(N=27)    | Placebo<br>(N=14) |
| Visit 1: Pre-Vaccination |           |                                                                           |                   |                                                                           |                  |                     |                   |
|                          | N         | 20                                                                        | 10                | 7                                                                         | 4                | 27                  | 14                |
|                          | GMT       | 7                                                                         | 7                 | 6                                                                         | 21               | 7                   | 9                 |
|                          | 95% CI    | 5 - 10                                                                    | 5 - 10            | 4 - 8                                                                     | 1 - 375          | 5 - 9               | 5 - 18            |
| Visit 3: Day 14          |           |                                                                           |                   |                                                                           |                  |                     |                   |
|                          | N         | 20                                                                        | 10                | 7                                                                         | 4                | 27                  | 14                |
|                          | GMT       | 53                                                                        | 8                 | 63                                                                        | 12               | 55                  | 9                 |
|                          | 95% CI    | 23 - 120                                                                  | 5 - 14            | 13 - 302                                                                  | 2 - 95           | 28 - 108            | 5 - 15            |

**Supplemental Table 2b.** Geometric Mean Titer (GMT) of *S. aureus* Als3-IgA1 in Saliva by Time Point, Treatment Group, and Baseline Nasal Colonization Status

| Time Point               | Statistic | <u>Baseline <i>S. aureus</i> Nasal Colonization Negative Subjects</u> |                | <u>Baseline <i>S. aureus</i> Nasal Colonization Positive Subjects</u> |               | <u>All Subjects</u> |                |
|--------------------------|-----------|-----------------------------------------------------------------------|----------------|-----------------------------------------------------------------------|---------------|---------------------|----------------|
|                          |           | NDV-3A (N=20)                                                         | Placebo (N=10) | NDV-3A (N=7)                                                          | Placebo (N=4) | NDV-3A (N=27)       | Placebo (N=14) |
| Visit 1: Pre-vaccination |           |                                                                       |                |                                                                       |               |                     |                |
|                          | N         | 20                                                                    | 10             | 7                                                                     | 3             | 27                  | 13             |
|                          | GMT       | 106                                                                   | 31             | 106                                                                   | 742           | 106                 | 65             |
|                          | 95% CI    | 33-340                                                                | 6-173          | 8-1475                                                                | 0->1,000,000  | 39-288              | 12-352         |
| Visit 3: Day 14          |           |                                                                       |                |                                                                       |               |                     |                |
|                          | N         | 20                                                                    | 10             | 7                                                                     | 4             | 27                  | 14             |
|                          | GMT       | 268                                                                   | 123            | 2833                                                                  | 2481          | 494                 | 291            |
|                          | 95% CI    | 73-987                                                                | 14-1052        | 642-12,505                                                            | 52-118,477    | 169-1446            | 49-1733        |

**Supplemental Table 3.** Number and Proportion of Study Participants Who Were Colonized at the Pre-Vaccination Visit by Study Group and by Training Company

| Site of Colonization | Study Group    | Total      | Cohort A (N=82) | <u>Distribution by Training Company</u> |                 |                 |
|----------------------|----------------|------------|-----------------|-----------------------------------------|-----------------|-----------------|
|                      |                |            |                 | Cohort B (N=120)                        | Cohort C (C=89) | Cohort D (N=89) |
| Nasal                | NDV-3A, n=189  | 63 (33.33) | 16 / 41 (39.02) | 20 / 60 (33.33)                         | 12 / 44 (27.27) | 15 / 44 (34.09) |
|                      | Placebo, n=191 | 61 (31.94) | 8 / 41 (19.51)  | 20 / 60 (33.33)                         | 18 / 45 (40)    | 15 / 45 (33.33) |

|            |                |             |                 |                 |                 |                 |
|------------|----------------|-------------|-----------------|-----------------|-----------------|-----------------|
| Oral       | NDV-3A, n=189  | 93 (49.21)  | 14 / 41 (34.15) | 36 / 60 (60)    | 21 / 44 (47.73) | 22 / 44 (50)    |
|            | Placebo, n=191 | 91 (47.64)  | 21 / 41 (51.22) | 28 / 60 (46.67) | 25 / 45 (55.56) | 17 / 45 (37.78) |
| Nasal/Oral | NDV-3A, n=189  | 113 (59.79) | 22 / 41 (53.66) | 40 / 60 (66.67) | 26 / 44 (59.09) | 25 / 44 (56.82) |
|            | Placebo, n=191 | 112 (58.64) | 24 / 41 (58.54) | 32 / 60 (53.33) | 31 / 45 (68.89) | 25 / 45 (55.56) |

Note: the nasal/oral endpoint was defined as a subject who had a positive *S. aureus* culture on either the nasal or the oral swab for a given timepoint

**Supplemental Figure 3.** Proportion and 95% Clopper Pearson Confidence Interval of *S. aureus* Positive Participants by Treatment Group and Study Visit Number -- Baseline *S. aureus* Nasal (a), Oral (b), and Nasal/Oral (c) Colonization Positive Subjects. The number of participants included in each analysis timepoint is included in the table.

(a) Nasal

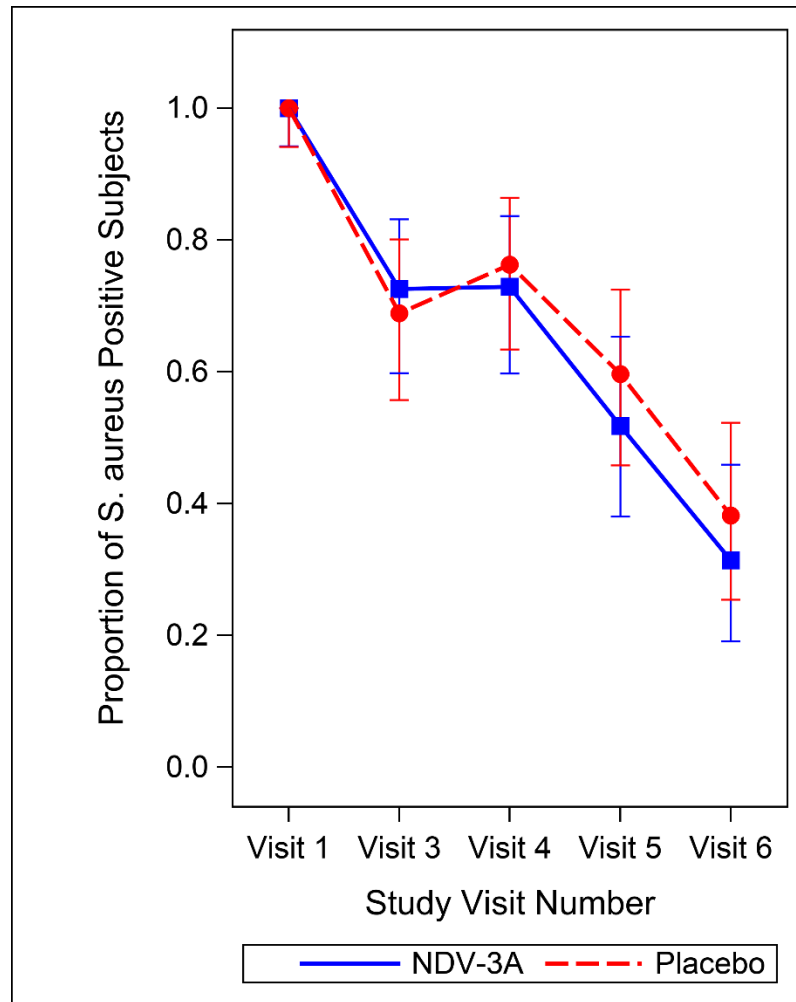

|             | Study Visit Number |   |   |   |   |
|-------------|--------------------|---|---|---|---|
| Study Group | 1                  | 3 | 4 | 5 | 6 |



|         |    |    |    |    |    |
|---------|----|----|----|----|----|
| NDV-3A  | 62 | 62 | 43 | 33 | 18 |
| Placebo | 62 | 61 | 41 | 31 | 18 |

(b) Oral

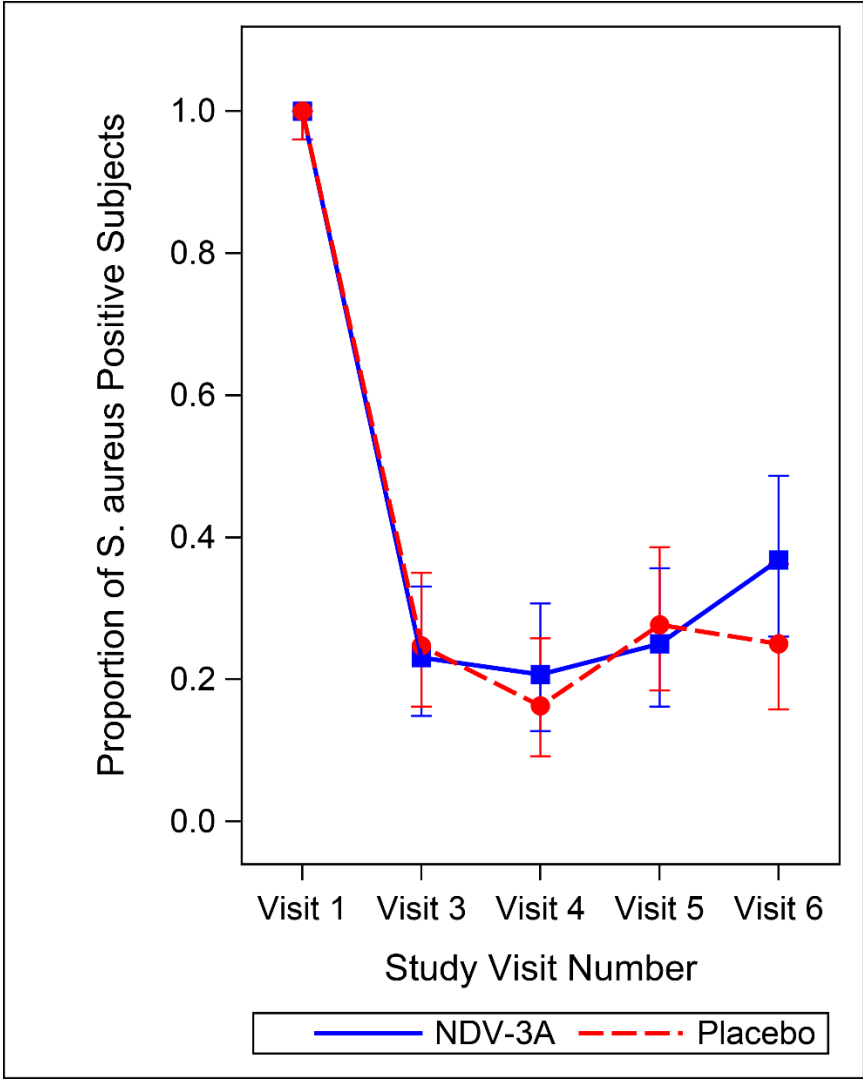

|  | Study Visit Number |
|--|--------------------|
|  |                    |

| <b>Study Group</b> | <b>1</b> | <b>3</b> | <b>4</b> | <b>5</b> | <b>6</b> |
|--------------------|----------|----------|----------|----------|----------|
| NDV-3A             | 91       | 91       | 21       | 4        | 1        |
| Placebo            | 89       | 89       | 23       | 6        | 3        |

(c) Nasal / Oral

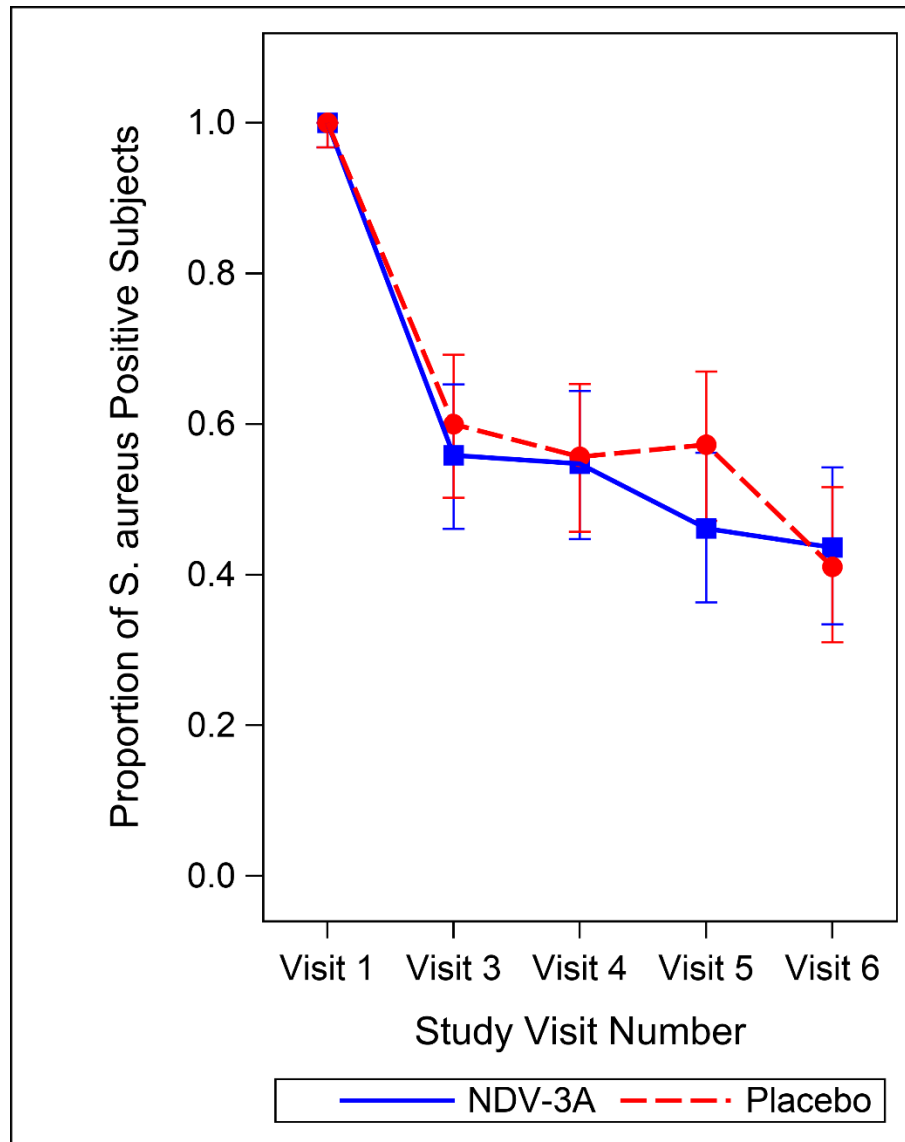

|  |                           |
|--|---------------------------|
|  | <b>Study Visit Number</b> |
|--|---------------------------|

| <b>Study Group</b> | <b>1</b> | <b>3</b> | <b>4</b> | <b>5</b> | <b>6</b> |
|--------------------|----------|----------|----------|----------|----------|
| NDV-3A             | 111      | 111      | 60       | 42       | 25       |
| Placebo            | 110      | 110      | 63       | 44       | 25       |
